# Supplementary material for: Anti-Allergic Effect of 3,4-Dihydroxybenzaldehyde Isolated from Polysiphonia morrowii in IgE/BSA-Stimulated Mast Cells and a Passive Cutaneous Anaphylaxis Mouse Model
Source: MDPI journal article supplement (doi:10.3390/md20020133), 2022-02-10
Supplement: s1 [file s1]

## Supplementary files

### Article,

#### **Anti-allergic effect of 3,4-dihydroxybenzaldehyde isolated from *Polysiphonia morrowii* in IgE/BSA-stimulated mast cells and a passive cutaneous anaphylaxis mouse model**

Eun-A Kim <sup>1,†</sup>, Eui-Jeong Han <sup>2,3,†</sup>, Junseong Kim <sup>1</sup>, Ilekuttige Priyan Shanura Fernando <sup>4</sup>, Jae-Young Oh <sup>5</sup>, Kil-Nam Kim <sup>6</sup>, Ginnae Ahn <sup>3,4,\*</sup>, and Soo-Jin Heo <sup>1,7,\*</sup>

<sup>1</sup> Jeju Marine Research Center, Korea Institute of Ocean Science & Technology (KIOST), Jeju 63349, Republic of Korea; [euna0718@kiost.ac.kr](mailto:euna0718@kiost.ac.kr) (E.-A. K); [junseong@kiost.ac.kr](mailto:junseong@kiost.ac.kr) (J. K)

<sup>2</sup> Research Center for Healthcare and Biomedical Engineering, Chonnam National University, Yeosu 59626, Korea; [iosu5772@naver.com](mailto:iosu5772@naver.com) (E.J.H)

<sup>3</sup> Department of Food Technology and Nutrition, Chonnam National University, Yeosu 59626, Republic of Korea; [iosu5772@naver.com](mailto:iosu5772@naver.com) (E.J.H)

<sup>4</sup> Department of Marine Bio-Food Sciences, Chonnam National University, Yeosu 59626, Republic of Korea; [shanurabru@jnu.ac.kr](mailto:shanurabru@jnu.ac.kr) (I.P.S.F)

<sup>5</sup> Food Safety and Processing Research Division, National Institute of Fisheries Science, Busan 46083, Republic of Korea; [ojy0724@korea.kr](mailto:ojy0724@korea.kr) (J.-Y.O)

<sup>6</sup> Chuncheon Center, Korea Basic Science Institute (KBSI), Chuncheon 24341, Republic of Korea; [knkim@kbsi.re.kr](mailto:knkim@kbsi.re.kr) (K.-N.K)

<sup>7</sup> Department of Marine Biology, University of Science and Technology, Daejeon 34113, Republic of Korea; [e-mail@e-mail.com](mailto:e-mail@e-mail.com)

\* Correspondence: [gnahn@jnu.ac.kr](mailto:gnahn@jnu.ac.kr) (G.A); [sjheo@kiost.ac.kr](mailto:sjheo@kiost.ac.kr) (S.-J.H.); Tel: +82-61-659-7213 (G.A); +82-64-798-6039 (S.-J.H.)

<sup>†</sup> These authors contributed equally to this study

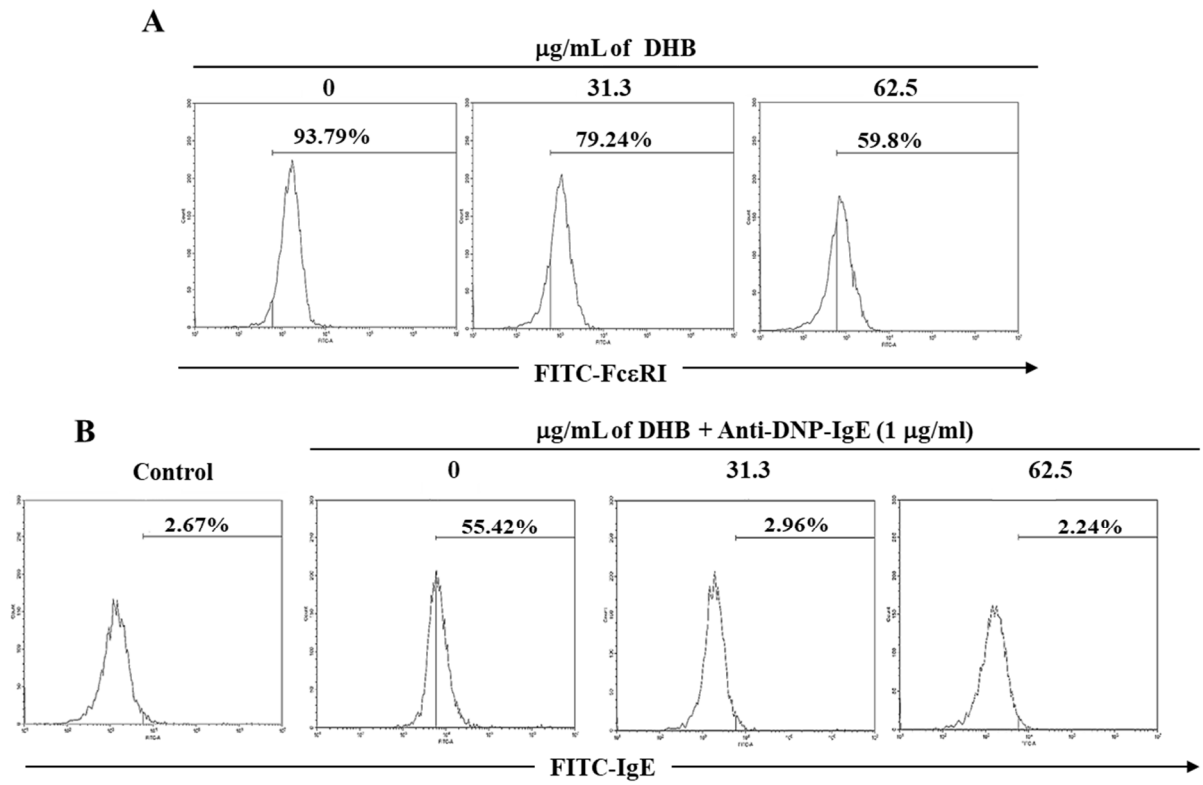

**Figure S1.** Effects of DHB on Fc $\epsilon$ RI expression and the crosslinking of IgE to Fc $\epsilon$ RI expression in IgE/BSA-stimulated BMCMCs. (A) cell surface Fc $\epsilon$ RI expression and (B) IgE antibody binding to Fc $\epsilon$ RI in BMCMCs.

**A**

|              |   |   |      |      |
|--------------|---|---|------|------|
| DHB (μg/mL)  | - | - | 31.3 | 62.5 |
| Anti-DNP-IgE | - | + | +    | +    |
| DNP-BSA      | - | + | +    | +    |

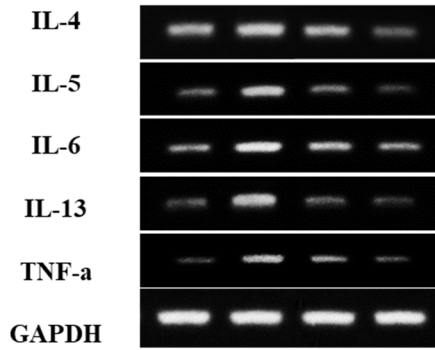**B**

|              |   |   |      |      |
|--------------|---|---|------|------|
| DHB (μg/mL)  | - | - | 31.3 | 62.5 |
| Anti-DNP-IgE | - | + | +    | +    |
| DNP-BSA      | - | + | +    | +    |

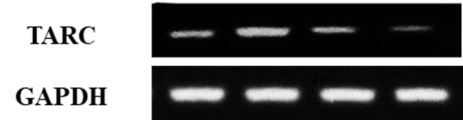

**Figure S2.** Effects of DHB on the mRNA expression levels of allergic cytokines and chemokine in IgE/BSA-stimulated BMCMCs. The expression levels of (A) cytokines and (B) chemokine using RT-PCR analysis.

**A**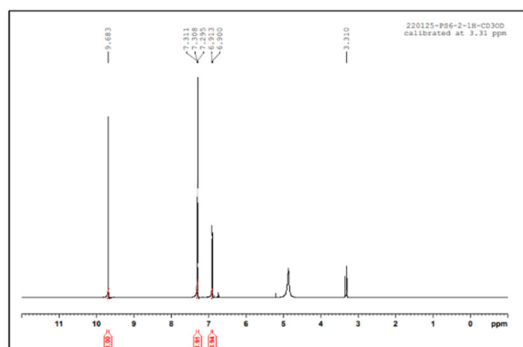**B**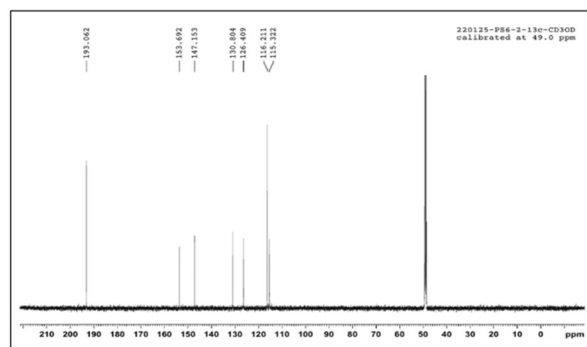

**Figure S3.** The <sup>1</sup>H (A) and <sup>13</sup>C (B) NMR spectrum of DHB.
